1 **Title:** Abortion Attitudes and Behavioral Intentions of Obstetrics and Gynecology Residents at  
2 Four Midwestern Residency Programs

3  
4 **Authors:** Abigail S. Cutler<sup>1</sup>, Elise S. Cowley<sup>2,3</sup>, Jessika A. Ralph<sup>4</sup>, Jessie Chen<sup>4</sup>, Amy  
5 Godecker<sup>1</sup>, Jordan Ward<sup>1</sup>, Sarah Hutto<sup>4</sup>, Laura Jacques<sup>1</sup>

6  
7 **Affiliations:**

8 <sup>1</sup>Dept of Obstetrics and Gynecology, University of Wisconsin School of Medicine and Public  
9 Health

10 <sup>2</sup>Dept of Bacteriology, University of Wisconsin School of Medicine and Public Health

11 <sup>3</sup>Microbiology Doctoral Training Program, University of Wisconsin School of Medicine and  
12 Public Health

13 <sup>4</sup>Dept of Obstetrics and Gynecology, University of Minnesota

14  
15 **Corresponding Author:**

16 Abigail Cutler, MD, MPH

17 Department of Obstetrics and Gynecology

18 University of Wisconsin School of Medicine and Public Health

19 West Clinic. 451 Junction Road.

20 Mail Code 9903.

21 Madison, WI 53717

22 Mobile: 1-207-650-8919. Fax: 1-608-265-7581

23  
24 **Disclosures:** None of the authors have a financial or other conflict of interest. The study was  
25 approved by The University of Wisconsin Health Sciences Institutional Review Board (2019-  
26 0697-CP003).

27  
28 **Short Title:** OBGYN Resident Physician Attitudes Toward Abortion

29 **Acknowledgements:** We wish to thank Andrea Zorbas, Sharon Blohowiak, Amanda  
30 Wildenberg, and Kelly Winum for administrative support. We thank Allison Linton and Kristina  
31 Kaljo for their contributions to study design and recruitment. We thank Nathan Jones and the  
32 UW-Madison Survey Center. The project was supported by institutional funding from the  
33 University of Wisconsin Department of Obstetrics and Gynecology. One author (ESC) was  
34 supported by a National Library training grant to the Computation and Informatics in Biology  
35 and Medicine Training Program (NLM 5T15LM007359) at UW-Madison and in part by Medical  
36 Scientist Training Program grant (T32GM140935). Some data from this study were previously  
37 presented in a poster at the 2022 CREOG & APGO Annual Meeting in Orlando, FL (March  
38 2022).

39  
40 **Precis:** The reversal of *Roe v Wade* and its impact on access to abortion training may affect  
41 obstetrics and gynecology residency recruitment and training and related career decision-making.

42  
43

44

45 **Abstract**

46 In June 2022, the U.S. Supreme Court overturned *Roe v Wade*. Half of states now face proposed  
47 or in-effect abortion bans, which affect the ability of obstetrics and gynecology (ObGyn)  
48 residency programs to provide abortion training. Prior to the Supreme Court decision, we  
49 surveyed ObGyn residents at all four programs in Wisconsin and Minnesota to assess residents'  
50 attitudes toward abortion, desire to learn about abortion, and intentions about providing abortion  
51 care in their future practice. We found that participants overwhelmingly support abortion, find  
52 the issue to be important, and plan to incorporate abortion into future practice. The reversal of  
53 *Roe v Wade* and its impact on access to abortion training may have implications for ObGyn  
54 residency recruitment and training, related career decision-making, and future workforce.

55

56

57

58

59

60

61

62

63

64

65

66

67

## 68 **Introduction**

69 The reversal of *Roe V. Wade* by the United States Supreme Court on June 24, 2022 has resulted  
70 in proposed or in-effect abortion bans spanning half the country<sup>1</sup>. Despite being one of the most  
71 common medical procedures in the U.S. and a required component of Obstetrics and Gynecology  
72 (ObGyn) resident education by the Accreditation Council of Graduate Medical Education, nearly  
73 half of all ObGyn residency programs now struggle to provide clinical abortion training<sup>2-5</sup>. The  
74 media has also raised concerns that wide geographic variations in abortion legality will adversely  
75 shape where physicians choose to train and ultimately practice<sup>6-8</sup>. To better understand how the  
76 fall of *Roe* may affect ObGyn residents' career decisions, it is crucial to understand their current  
77 attitudes towards abortion, their desire to learn about abortion, and the importance they place on  
78 being able to provide abortion care in their future work. Current literature on these topics is  
79 sparse. We assessed attitudes and career intentions toward abortion among ObGyn residents in  
80 Minnesota and Wisconsin.

81

## 82 **Methods**

83 We emailed a voluntary online survey to all ObGyn residents scheduled to participate in a  
84 workshop exploring abortion attitudes at the University of Minnesota (UMN), University of  
85 Wisconsin-Madison (UW), Medical College of Wisconsin (MCW) and Aurora-Sinai Milwaukee  
86 (Aurora) between January and December 2021. We obtained demographic information and used  
87 a previously published questionnaire to assess attitudes toward abortion care and behavioral  
88 intentions for future practice<sup>9</sup>. To assess attitudes, we asked the degree to which participants  
89 agreed with 17 statements about abortion using a 5-point Likert scale. To assess behavioral  
90 intentions, we posed six yes/no questions regarding intent to learn about, advocate for, refer

91 patients to, and provide abortion care. Survey participants received a ten-dollar Amazon gift-  
92 card link. We created summative attitude scores which ranged from 0 (most negative toward  
93 abortion) to 100 (most positive toward abortion)<sup>9</sup>. We performed the Kruskal-Wallis rank test to  
94 assess for significant differences between observed institutional summative attitude scores.

95

## 96 **Results**

97 A total of 55/70 (79%) ObGyn residents completed the survey, 17/21 (81%) from UMN, 14/20  
98 (70%) from UW, 14/16 (88%) from MCW, and 10/13 (77%) from Aurora. Of residents who  
99 completed the survey, 46 (84%) identified as women, 28 (51%) were born in the Midwest, 36  
100 (65%) did not identify with a particular religion (Table 1). Summaries of responses to individual  
101 attitude and behavioral intention questions are shown in Figure 1.

102

103 The mean attitude score for ObGyn residents was 92.4 (SD 8.0). There were no differences in  
104 mean attitude scores among institutions. Nearly all residents (49/55, 89%) disagreed with the  
105 statement “the issue of abortion has little importance to me”. Almost all residents agreed that  
106 “All people should have access to safe, comprehensive abortion care in the first (55/55, 100%)  
107 and second (54/55, 98%) trimester. Nearly all residents (52/55, 95%) wanted to learn more about  
108 the need for safe, comprehensive abortion care and 46/55 (84%) planned to provide abortion care  
109 in their future careers.

110

## 111 **Discussion**

112 Our research demonstrates that ObGyn residents in our sample hold highly favorable attitudes  
113 toward abortion, and nearly all find the issue of abortion to be important and plan to incorporate

114 abortion care into their future work. This data suggests that access to abortion training may  
115 influence where ObGyn residents choose to train and ultimately practice. While some who value  
116 abortion training and provision may avoid states where abortion is restricted, others may wish to  
117 be drawn where the need for advocacy is high. Understanding the forces that shape the future  
118 ObGyn workforce is key, especially given pre-existing concerns about impending ObGyn  
119 shortages in certain areas of the country<sup>10</sup>. Future research should directly evaluate how state-  
120 level abortion restrictions impact both recruitment into ObGyn residency programs and career  
121 decision-making among graduating residents.

122

## 123 **References**

- 124 1. 26 States Are Certain or Likely to Ban Abortion Without Roe: Here's Which Ones and Why.  
125 Guttmacher Institute. Published October 8, 2021. Accessed July 15, 2022.  
126 [https://www.guttmacher.org/article/2021/10/26-states-are-certain-or-likely-ban-abortion-](https://www.guttmacher.org/article/2021/10/26-states-are-certain-or-likely-ban-abortion-without-roe-heres-which-ones-and-why)  
127 [without-roe-heres-which-ones-and-why](https://www.guttmacher.org/article/2021/10/26-states-are-certain-or-likely-ban-abortion-without-roe-heres-which-ones-and-why)
- 128 2. Kortsmit K. Abortion Surveillance — United States, 2019. *MMWR Surveill Summ.* 2021;70.  
129 [doi:10.15585/mmwr.ss7009a1](https://doi.org/10.15585/mmwr.ss7009a1)
- 130 3. Jones RK, Jerman J. Population Group Abortion Rates and Lifetime Incidence of Abortion:  
131 United States, 2008–2014. *Am J Public Health.* 2017;107(12):1904-1909.  
132 [doi:10.2105/AJPH.2017.304042](https://doi.org/10.2105/AJPH.2017.304042)
- 133 4. ACGME. Obstetrics and Gynecology Milestones - The Accreditation Council for Graduate  
134 Medical Education. Published online August 2021.
- 135 5. Vinekar K, Karlapudi A, Nathan L, Turk JK, Rible R, Steinauer J. Projected Implications of  
136 Overturning Roe v Wade on Abortion Training in U.S. Obstetrics and Gynecology Residency  
137 Programs. 2022;00(00):4.

- 138 6. Meyerhofer K. In a post-Roe world, some medical students rethink plans to practice in  
139 Wisconsin. *Journal Sentinel*. Published June 29, 2022. Accessed July 15, 2022.  
140 [https://www.jsonline.com/story/news/education/2022/06/29/roe-ruling-abortion-ban-affects-](https://www.jsonline.com/story/news/education/2022/06/29/roe-ruling-abortion-ban-affects-wisconsin-doctor-recruitment-uw-madison-medical-college-mcw-ob-gyn/7747097001/)  
141 [wisconsin-doctor-recruitment-uw-madison-medical-college-mcw-ob-gyn/7747097001/](https://www.jsonline.com/story/news/education/2022/06/29/roe-ruling-abortion-ban-affects-wisconsin-doctor-recruitment-uw-madison-medical-college-mcw-ob-gyn/7747097001/)
- 142 7. Weiner S. How the repeal of Roe v. Wade will affect training in abortion and reproductive  
143 health. *AAMC*. Published June 24, 2022. Accessed July 15, 2022.  
144 [https://www.aamc.org/news-insights/how-repeal-roe-v-wade-will-affect-training-abortion-](https://www.aamc.org/news-insights/how-repeal-roe-v-wade-will-affect-training-abortion-and-reproductive-health)  
145 [and-reproductive-health](https://www.aamc.org/news-insights/how-repeal-roe-v-wade-will-affect-training-abortion-and-reproductive-health)
- 146 8. Patel K. The consequences of abortion bans for people who don't want one are growing.  
147 *MSNBC.com*. Published July 14, 2022. Accessed July 15, 2022.  
148 [https://www.msnbc.com/opinion/msnbc-opinion/abortion-bans-are-dangerous-roadblock-](https://www.msnbc.com/opinion/msnbc-opinion/abortion-bans-are-dangerous-roadblock-america-s-future-doctors-n1297263)  
149 [america-s-future-doctors-n1297263](https://www.msnbc.com/opinion/msnbc-opinion/abortion-bans-are-dangerous-roadblock-america-s-future-doctors-n1297263)
- 150 9. Turner KL, Pearson E, George A, Andersen KL. Values clarification workshops to improve  
151 abortion knowledge, attitudes and intentions: a pre-post assessment in 12 countries.  
152 *Reproductive Health*. 2018;15(1):40. doi:10.1186/s12978-018-0480-0
- 153 10. Orvos JM. ACOG releases new study on ob/gyn workforce: trends similar to those seen in  
154 previous studies expected to continue. *Contemporary OB/GYN*. 2017;62(7):50-53.

155  
156  
157  
158  
159  
160  
161  
162  
163  
164  
165  
166

167 **Table 1.** Demographics of survey participants.

| <b>Resident characteristics</b>                                                                                                                                                                       | <b>N (%)</b>    |
|-------------------------------------------------------------------------------------------------------------------------------------------------------------------------------------------------------|-----------------|
| <b>Total</b>                                                                                                                                                                                          | <b>55 (100)</b> |
| <b>Institution</b>                                                                                                                                                                                    |                 |
| University of Minnesota, Twin Cities                                                                                                                                                                  | 17 (31)         |
| Medical College of Wisconsin                                                                                                                                                                          | 14 (25)         |
| Aurora-Sinai of Milwaukee                                                                                                                                                                             | 10 (18)         |
| University of Wisconsin-Madison                                                                                                                                                                       | 14 (25)         |
| <b>Self-Identified Gender</b>                                                                                                                                                                         |                 |
| Man                                                                                                                                                                                                   | 9 (16)          |
| Woman                                                                                                                                                                                                 | 46 (84)         |
| <b>Age (years)</b>                                                                                                                                                                                    |                 |
| Minimum                                                                                                                                                                                               | 26              |
| Maximum                                                                                                                                                                                               | 35              |
| Mean                                                                                                                                                                                                  | 29              |
| <b>Born in the United States</b>                                                                                                                                                                      |                 |
| No                                                                                                                                                                                                    | 5 (9)           |
| Yes                                                                                                                                                                                                   | 50 (91)         |
| <b>Born in a Midwestern<sup>1</sup> State</b>                                                                                                                                                         |                 |
| No                                                                                                                                                                                                    | 22 (44)         |
| Yes                                                                                                                                                                                                   | 28 (56)         |
| <b>Identify with a particular religion</b>                                                                                                                                                            |                 |
| No                                                                                                                                                                                                    | 36 (65)         |
| Yes                                                                                                                                                                                                   | 19 (35)         |
| <b>Year in Training</b>                                                                                                                                                                               |                 |
| PGY1                                                                                                                                                                                                  | 17 (31)         |
| PGY2                                                                                                                                                                                                  | 14 (25)         |
| PGY3                                                                                                                                                                                                  | 12 (22)         |
| PGY4                                                                                                                                                                                                  | 12 (22)         |
| <b>Interested in pursuing a fellowship</b>                                                                                                                                                            |                 |
| No                                                                                                                                                                                                    | 39 (71)         |
| Yes                                                                                                                                                                                                   | 16 (29)         |
| <sup>1</sup> Following U.S. Census definitions, Midwestern states included Illinois, Indiana, Iowa, Kansas, Michigan, Minnesota, Missouri, Nebraska, North Dakota, Ohio, South Dakota, and Wisconsin. |                 |

168  
169  
170

171 **Figure 1. Summary of attitudes and behavioral intentions on abortion for all participants.**  
172 Percentage of participants for each response option for **A.** attitudes and **B.** behavioral intentions  
173 on abortion.

174  
175 **A.**

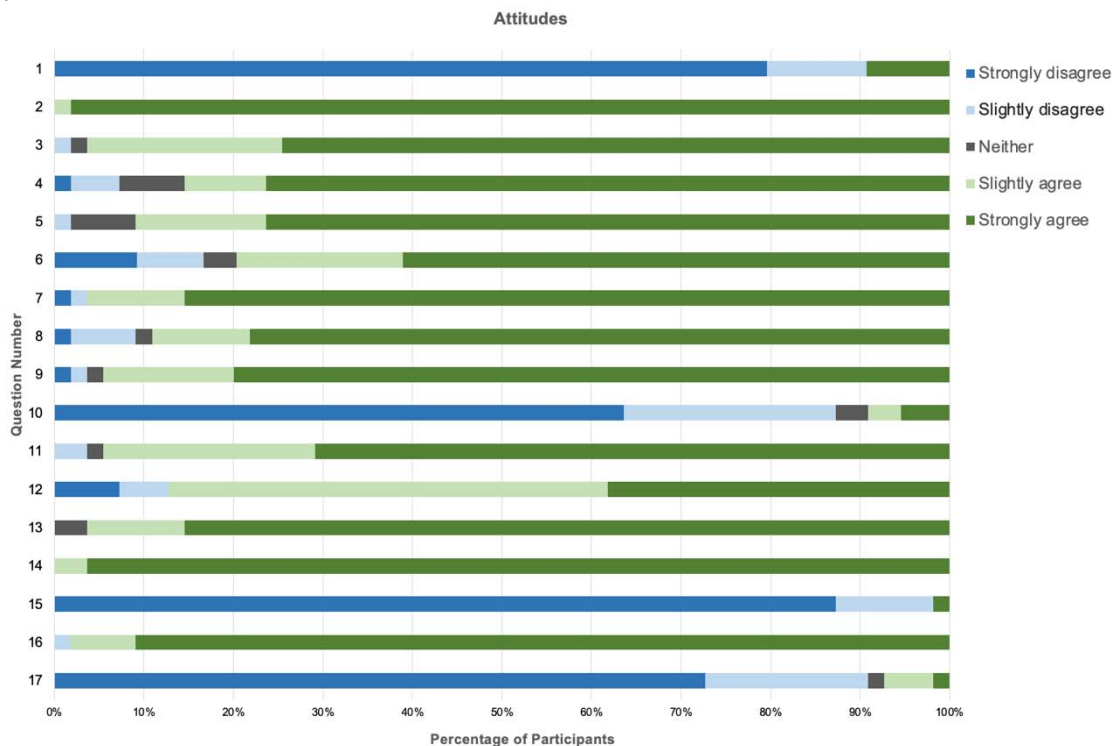

176  
177 **B.**

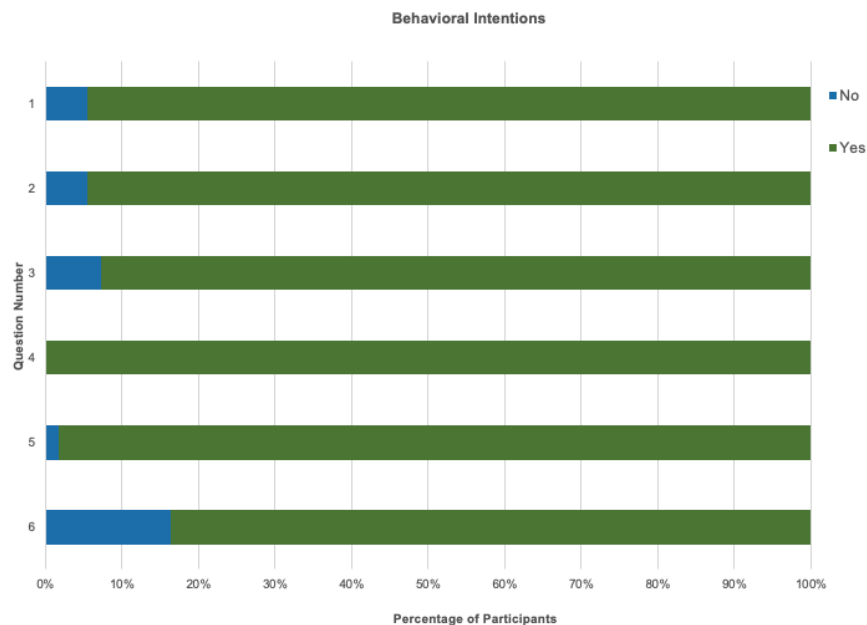

178  
179  
180



181 Attitude Questions:

- 182 1. The issue of abortion is of little importance to me.
- 183 2. I support the provision of family planning and contraceptive services.
- 184 3. I feel comfortable working to increase access to family planning and contraceptive services.
- 185 4. I support the provision of abortion services as permitted by law.
- 186 5. I feel comfortable working to increase access to abortion services as permitted by law.
- 187 6. I feel comfortable talking with my closest family members about my involvement with
- 188 abortion care.
- 189 7. I would feel comfortable observing an abortion procedure.
- 190 8. I would feel comfortable performing or assisting an abortion procedure.
- 191 9. I am clear about my personal values concerning abortion.
- 192 10. I feel very conflicted about abortion.
- 193 11. I can clearly explain my personal values concerning abortion.
- 194 12. I can respectfully explain values concerning abortion that conflict with mine.
- 195 13. I feel empathy for people who have experienced abortion.
- 196 14. All people should have access to safe, comprehensive abortion care in the first trimester.
- 197 15. Access to first trimester abortion should be restricted to certain circumstances.
- 198 16. All people should have access to safe, comprehensive abortion care in the second trimester.
- 199 17. Access to second trimester abortion should be restricted to certain circumstances.

200

201 Behavioral Intentions Questions:

- 202 1. Learn more about the need for safe, comprehensive abortion care.
- 203 2. Raise awareness about the need for safe, comprehensive abortion care.
- 204 3. Advocate making safe, comprehensive abortion care widely available.
- 205 4. Educate people about safe abortion services.
- 206 5. Refer people seeking abortion to safe services.
- 207 6. Provide or assist with safe, comprehensive abortion procedures.

208
